# Supplementary material
Source: publisher figshare collection journal article supplement (https://karger.figshare.com/articles/dataset/_/12472205)
Supplement: Supplementary file 1 [file 1]

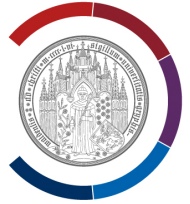

## Evaluation der Prüfung des M.Sc. Moduls B Klinische Psychologie und Psychotherapie (V2)

**Liebe Studierende,**

*da wir in diesem Wintersemester durch die anwendungsorientierte kurze „Parcoursprüfung“ ein neues Prüfungsformat einführen, sind wir sehr interessiert daran zu erfahren, wie Sie als Prüfling dieses Format erleben!*

*Daher bitten wir Sie herzlich, nach Ihrer Prüfung diese anhand des folgenden Fragebogens kurz zu evaluieren. Ihre Evaluation wird uns helfen, die Prüfungsformate zukünftig noch besser auf die Bedürfnisse der Studierenden abzustimmen und die Prüfung insgesamt zu optimieren.*

*Bitte füllen Sie den Evaluationsbogen auch aus, wenn Sie die Variante 1 gewählt haben.*

*Die Evaluation erfolgt selbstverständlich auf freiwilliger Basis und wird anonymisiert ausgewertet. Keine Rückmeldung kann einer spezifischen Person zugeordnet werden.*

*Die Ergebnisse der Evaluation werden ggf. gemeinsam mit einer Beschreibung des Prüfungsformats publiziert, um unsere Erfahrungen mit der gewählten Prüfungsform auch mit den Kolleginnen und Kollegen anderer deutschsprachiger Institute für Psychologie in zu teilen.*

*Durch Ihre Teilnahme erklären Sie sich damit einverstanden, dass die Evaluation möglicherweise publiziert wird.*

*Herzlichen Dank,*

*Prof. Dr. Eva-Lotta Brakemeier, Dr. Tim Kaiser, Dipl. Psych. Philipp Herzog &  
Dr. Jan Richter*

**Bitte schätzen Sie nachfolgend Ihre absolvierte Prüfung  
des M.Sc. Moduls B „Klinische Psychologie und Psychotherapie“ ein.**

Variante 2

Wir bitten Sie, dafür das folgende Antwortformat zu nutzen:

stimme nicht zu (1), stimme eher nicht zu (2), weder noch (3), stimme eher zu (4), stimme zu (5)

|    | Die Prüfung ...                                                                                                                                          |    |   |      |   |        |
|----|----------------------------------------------------------------------------------------------------------------------------------------------------------|----|---|------|---|--------|
| 1  | ... war geeignet als Test theoretischen Wissens.                                                                                                         | 1  | 2 | 3    | 4 | 5      |
| 2  | ... war geeignet als Test praktischer Fertigkeiten.                                                                                                      | 1  | 2 | 3    | 4 | 5      |
| 3  | ... war geeignet, mein erworbenes Wissen aus den Seminaren abzubilden.                                                                                   | 1  | 2 | 3    | 4 | 5      |
| 4  | ... war geeignet, meine erworbenen praktischen Fertigkeiten aus den Seminaren abzubilden.                                                                | 1  | 2 | 3    | 4 | 5      |
| 5  | ... erschien mir objektiv.                                                                                                                               | 1  | 2 | 3    | 4 | 5      |
| 6  | ... erschien mir praxisnah.                                                                                                                              | 1  | 2 | 3    | 4 | 5      |
| 7  | ... hat mich gestresst.                                                                                                                                  | 1  | 2 | 3    | 4 | 5      |
| 8  | ... hat mir Spaß gemacht.                                                                                                                                | 1  | 2 | 3    | 4 | 5      |
| 9  | Die Prüfungsfragen waren eindeutig und verständlich formuliert.                                                                                          | 1  | 2 | 3    | 4 | 5      |
| 10 | Der Aufwand zur Vorbereitung der Prüfung erscheint mir angemessen.                                                                                       | 1  | 2 | 3    | 4 | 5      |
| 11 | Durch die Vorbereitung auf diese Prüfung haben mein Interesse und meine Begeisterung für das Fach ‚Klinische Psychologie und Psychotherapie‘ zugenommen. | 1  | 2 | 3    | 4 | 5      |
| 12 | Die Vorbereitung auf diese Prüfung hat mir geholfen, mich für oder gegen die Ausbildung zum Psychologischen Psychotherapeuten zu entscheiden.            | 1  | 2 | 3    | 4 | 5      |
|    |                                                                                                                                                          |    |   |      |   |        |
| 13 | Ich möchte nach meinem Masterstudium die Ausbildung zum Psychologischen Psychotherapeuten absolvieren.                                                   | Ja |   | Nein |   | Unklar |

**Für weitere Anmerkungen jeglicher Art zur Prüfung von Ihnen sind wir sehr dankbar:**

---



---



---



---



---



---

*Vielen Dank!*
