# Supplementary material
Source: publisher figshare collection journal article supplement (https://karger.figshare.com/articles/dataset/_/12472205)
Supplement: Supplementary file 2 [file 1]

# Leistungskriterien für die praktische Prüfung „Unified Protocol“

Name: \_\_\_\_\_  
Punktzahl gesamt: \_\_\_\_ von 15

Datum: \_\_\_\_\_  
Note: \_\_\_\_\_

| Kompetenzbereich                                                                                   | Kriterien (max. Punktzahl)                                                                                                                                                                                                                                                                           | Punkte / Anmerkungen |
|----------------------------------------------------------------------------------------------------|------------------------------------------------------------------------------------------------------------------------------------------------------------------------------------------------------------------------------------------------------------------------------------------------------|----------------------|
| 2 (Achtsamkeit)                                                                                    | <b>Vermittlung von Inhalten (3)<sup>1</sup></b><br>Objektive, nicht-wertende Haltung gegenüber Emotionen, Gegenwartsbezogene Aufmerksamkeit<br><b>Durchführung (geführte Meditation oder Emotionsinduktion mit Musik) (5)<sup>2</sup></b><br>Durchführung<br><b>Nachbesprechung (2) <sup>3</sup></b> |                      |
| 3 (Kognitive Flexibilität)                                                                         | <b>Vermittlung von Inhalten (3)</b><br>Wechselseitige Beziehung Gedanken und Gefühle, Automatische Gedanken, Denkfallen<br><b>Durchführung (Mehrdeutiges Bild, Pfeil-Übung oder Denkfallen – eine bis zwei Übungen) (5)</b><br><b>Nachbesprechung (2)</b>                                            |                      |
| 4 (Emotionsbezogenes Verhalten)                                                                    | <b>Vermittlung von Inhalten</b><br>Vermeidung einführen, Vermeidungsarten, am Beispiel besprechen (3)<br><b>Durchführung (Exploration von Vermeidung, alternative Handlungen generieren) (5)</b><br><b>Nachbesprechung (2)</b>                                                                       |                      |
| 5 (Körperliche Empfindungen)                                                                       | <b>Einführung (3)</b><br>Klärung evtl. medizinischer Kontraindikationen<br><b>Durchführung (interozeptive Exposition nach Vorgabe, maximal zwei Übungen) (5)</b><br>Nachbesprechung (2)                                                                                                              |                      |
| 6 (Exposition – sollte nur einzeln über 15 Minuten geprüft werden, da die Zeit sonst zu knapp ist) | <b>Einführung (2)</b><br>Alte vs. Neue Assoziationen, Gründe für Exposition<br><b>Erarbeitung einer Expositionshierarchie, Vorbereitung (u.V. Arbeitsblatt) (2)</b><br><b>Durchführung Exposition (5)</b><br><b>Nachbesprechung (u.V. Arbeitsblatt) (1)</b>                                          |                      |
| Übergreifend                                                                                       | <b>Adäquate Reaktion auf Widerstand, Vermeidung und sonstige Probleme (3)</b><br><br><b>Beachtung von Grundregeln der Gesprächsführung (2)</b>                                                                                                                                                       |                      |

<sup>1</sup> Allgemein: Einführung des Themas mit für Pat. relevantem Beispiel, Zweck der kommenden Übung wird deutlich, Bezug auf Dreikomponentenmodell

<sup>2</sup> Allgemein: flüssige Durchführung, adaptiver Umgang mit Schwierigkeiten, adäquate Verstärkung während der Übungen, je nach Übung angemessene Haltung (z.B: direktive Haltung bei Exposition, ruhige und entspannte Haltung bei Meditationsübung)

<sup>3</sup> Allgemein: Verstärkung nach der Übung, Exploration und Klärung von Problemen bei der Durchführung, evtl. Besprechung vom „Transfer in den Alltag“
