# Supplementary material
Source: publisher figshare collection journal article supplement (https://karger.figshare.com/articles/dataset/_/12472205)
Supplement: Supplementary file 3 [file 1]

# Leistungskriterien für die praktische Prüfung „Moderne Ansätze“

Name: \_\_\_\_\_  
Punktzahl gesamt: \_\_\_\_ von 15

Datum: \_\_\_\_\_  
Note: \_\_\_\_\_

| Kompetenzbereich                                            | Kriterien (max. Punktzahl)                                                                                                                                                                                                                                                                                                                                                                                                                                                                                                                                                                                                                                                                                                                                                                                                                                                                                                   | Punkte / Anmerkungen |
|-------------------------------------------------------------|------------------------------------------------------------------------------------------------------------------------------------------------------------------------------------------------------------------------------------------------------------------------------------------------------------------------------------------------------------------------------------------------------------------------------------------------------------------------------------------------------------------------------------------------------------------------------------------------------------------------------------------------------------------------------------------------------------------------------------------------------------------------------------------------------------------------------------------------------------------------------------------------------------------------------|----------------------|
| 7 CBASP (verschlossen, suizidal, wütend, verliebt)          | <p><b>Einsatz des disziplinierten persönlichen Einlassens (4)</b><br/>           Situation fürs DPE wahrnehmen, durch Empathietraining Patient unterbrechen, Selbstoffenbarung diszipliniert vornehmen, zum „interpersonellen Problem“ werden, Bezug zu den Prägungen herstellen, in die IDÜ überleiten</p> <p><b>Anwendung der Interpersonellen Diskriminationsübung (3)</b><br/>           Vergleich der Reaktion von früheren Bezugspersonen mit der eigenen Reaktion, Unterschiede benennen lassen und nach Bedeutung / Emotionen fragen</p> <p><b>Qualität der therapeutischen Beziehungsgestaltung bzw. – bei Indikation – Anwendung weiterer CBASP Strategien (3)</b><br/>           Sicherheitszone, Empathie und Wärme, effektives Zuhören, angemessene Kontrolle der Sitzung, Toleranz des negativen Affektes des Patienten, Einsatz weiterer Techniken wie Situationsanalyse und Kiesler Kreis bei Indikation</p> |                      |
| 8 DBT (verschlossen, suizidal, wütend, verliebt)            | <p><b>Anwendung von DBT spezifischen Techniken (4)</b><br/>           Abfragen der Arbeitsfähigkeit, Skillsübungen einbauen, Abfrage Diary Card, Fokus auf Exploration der (primären) Gefühle, Blockieren von dysfunktionalem Verhalten, Beziehungsmuster benennen, Verhaltensanalysen</p> <p><b>Fokus auf Emotionen (3)</b><br/>           Zusammenarbeit, Empathie, effektives Zuhören, angemessene Kontrolle der Sitzung, Toleranz des negativen Affektes des Patienten, Einsatz weiterer Techniken wie Verhaltensanalysen anwenden</p> <p><b>Allgemeine DBT Haltung / therapeutische Beziehungsgestaltung (3)</b><br/>           Validierung, Akzeptanz, Authentizität, DBT-Wippe, Grenzen einhalten für sich und Patienten, direktives Vorgehen</p>                                                                                                                                                                     |                      |
| 9 Schematherapie (verschlossen, suizidal, wütend, verliebt) |                                                                                                                                                                                                                                                                                                                                                                                                                                                                                                                                                                                                                                                                                                                                                                                                                                                                                                                              |                      |
| Übergreifend                                                | <p><b>Adäquate Reaktion auf Widerstand, Vermeidung und sonstige Probleme (3)</b></p> <p><b>Beachtung von Grundregeln der Gesprächsführung (2)</b></p>                                                                                                                                                                                                                                                                                                                                                                                                                                                                                                                                                                                                                                                                                                                                                                        |                      |
