# Supplementary material
Source: publisher figshare collection journal article supplement (https://karger.figshare.com/articles/dataset/_/12472205)
Supplement: Supplementary file 4 [file 1]

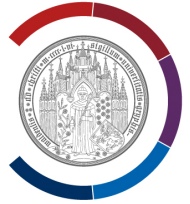

## Evaluation der Prüfung des M.Sc. Moduls B Klinische Psychologie und Psychotherapie

**Liebe Prüfende,**

*da wir in diesem Wintersemester durch die anwendungsorientierte kurze „Parcoursprüfung“ ein neues Prüfungsformat einführen, sind wir sehr interessiert daran zu erfahren, wie Sie als Prüfende(r) die gerade vergangene Prüfung empfanden!*

*Daher bitten wir Sie herzlich, nach der abgenommenen Prüfung diese anhand des folgenden Fragebogens kurz zu evaluieren. Ihre Evaluation wird uns helfen, die Prüfungsformate zukünftig zu optimieren.*

*Die Evaluation erfolgt selbstverständlich auf freiwilliger Basis und wird anonymisiert ausgewertet.*

*Die Ergebnisse der Evaluation werden ggf. gemeinsam mit einer Beschreibung des Prüfungsformats publiziert, um unsere Erfahrungen mit der gewählten Prüfungsform auch mit den Kolleginnen und Kollegen anderer deutschsprachiger Institute für Psychologie in zu teilen.*

*Durch Ihre Teilnahme erklären Sie sich damit einverstanden, dass die Evaluation möglicherweise publiziert wird.*

*Herzlichen Dank,*

*Prof. Dr. Eva-Lotta Brakemeier, Dr. Tim Kaiser, Dipl. Psych. Philipp Herzog &  
Dr. Jan Richter*

Bitte schätzen Sie nachfolgend die abgenommene Prüfung  
des M.Sc. Moduls B „Klinische Psychologie und Psychotherapie“ ein.

Variante: \_\_\_\_\_

Code: \_\_\_\_\_

Datum: \_\_\_\_\_

(1: mündlich, 2: praktisch)

Wir bitten Sie, dafür das folgende Antwortformat zu nutzen:

stimme nicht zu (1), stimme eher nicht zu (2), weder noch (3), stimme eher zu (4), stimme zu (5)

| Die gerade abgenommene Prüfung ...      |                                                                                                          |   |   |   |   |   |
|-----------------------------------------|----------------------------------------------------------------------------------------------------------|---|---|---|---|---|
| A1                                      | ... war geeignet, das theoretische Wissen des Studierenden abzubilden.                                   | 1 | 2 | 3 | 4 | 5 |
| A2                                      | ... war geeignet, die praktischen Fertigkeiten des Studierenden abzubilden.                              | 1 | 2 | 3 | 4 | 5 |
| A3                                      | ... war geeignet, das erworbene Wissen des Studierenden aus den Seminaren abzubilden.                    | 1 | 2 | 3 | 4 | 5 |
| A4                                      | ... war geeignet, die erworbenen praktischen Fertigkeiten des Studierenden aus den Seminaren abzubilden. | 1 | 2 | 3 | 4 | 5 |
| A5                                      | ... erschien mir vom Schwierigkeitsgrad angemessen.                                                      | 1 | 2 | 3 | 4 | 5 |
| A6                                      | ... erschien mir praxisnah.                                                                              | 1 | 2 | 3 | 4 | 5 |
| Ich als Prüfer/in ...                   |                                                                                                          |   |   |   |   |   |
| P1                                      | ... konnte objektiv über die Prüfungsleistung urteilen.                                                  | 1 | 2 | 3 | 4 | 5 |
| P2                                      | ... konnte eine faire Prüfung durchführen.                                                               | 1 | 2 | 3 | 4 | 5 |
| P3                                      | ... konnte die Prüfungsfragen eindeutig und verständlich formulieren.                                    | 1 | 2 | 3 | 4 | 5 |
| P4                                      | ... konnte standardisierte Bewertungen abgeben.                                                          | 1 | 2 | 3 | 4 | 5 |
| P5                                      | ... fühlte mich gestresst.                                                                               | 1 | 2 | 3 | 4 | 5 |
| P6                                      | ... war mit der Durchführung überfordert.                                                                | 1 | 2 | 3 | 4 | 5 |
| P7                                      | ... hatte Spaß an der Prüfung.                                                                           | 1 | 2 | 3 | 4 | 5 |
| Der/die soeben geprüfte Studierende ... |                                                                                                          |   |   |   |   |   |
| S1                                      | ... wirkte nervös.                                                                                       | 1 | 2 | 3 | 4 | 5 |
| S2                                      | ... wirkte im Umgang mit mir authentisch.                                                                | 1 | 2 | 3 | 4 | 5 |
| S4                                      | ... wirkte gestresst.                                                                                    | 1 | 2 | 3 | 4 | 5 |
| S5                                      | ... wirkte mit der Prüfungssituation überfordert.                                                        | 1 | 2 | 3 | 4 | 5 |
| S6                                      | ... schien Spaß an der Prüfung zu haben.                                                                 | 1 | 2 | 3 | 4 | 5 |
