# Supplementary material
Source: publisher figshare collection journal article supplement (https://karger.figshare.com/articles/dataset/_/12472205)
Supplement: Supplementary file 5 [file 1]

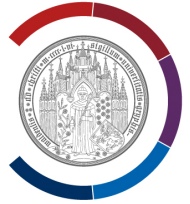

## Evaluation der Prüfung des M.Sc. Moduls B Klinische Psychologie und Psychotherapie

***Liebe Simulationspatientin, lieber Simulationspatient,***

*da wir in diesem Wintersemester durch die anwendungsorientierte kurze „Parcoursprüfung“ ein neues Prüfungsformat einführen, sind wir sehr interessiert daran zu erfahren, wie Sie als Simulationspatient\*in dieses Format empfinden!*

*Daher bitten wir Sie herzlich, nach den Prüfungen diese anhand des folgenden Fragebogens kurz zu evaluieren. Ihre Evaluation wird uns helfen, die Prüfungsformate zukünftig zu optimieren.*

*Die Evaluation erfolgt selbstverständlich auf freiwilliger Basis und wird anonymisiert ausgewertet.*

*Die Ergebnisse der Evaluation werden ggf. gemeinsam mit einer Beschreibung des Prüfungsformats publiziert, um unsere Erfahrungen mit der gewählten Prüfungsform auch mit den Kolleginnen und Kollegen anderer deutschsprachiger Institute für Psychologie in zu teilen.*

*Durch Ihre Teilnahme erklären Sie sich damit einverstanden, dass die Evaluation möglicherweise publiziert wird.*

*Herzlichen Dank,*

*Prof. Dr. Eva-Lotta Brakemeier, Dr. Tim Kaiser, Dipl. Psych. Philipp Herzog &  
Dr. Jan Richter*

Bitte schätzen Sie nachfolgend die durchgeführte Prüfung  
des M.Sc. Moduls B „Klinische Psychologie und Psychotherapie“ ein.

Variante: 2

Code: \_\_\_\_\_

Datum: \_\_\_\_\_

Wir bitten Sie, dafür das folgende Antwortformat zu nutzen:

stimme nicht zu (1), stimme eher nicht zu (2), weder noch (3), stimme eher zu (4), stimme zu (5)

|    |                                                                                            |   |   |   |   |   |
|----|--------------------------------------------------------------------------------------------|---|---|---|---|---|
|    | <b>Die gerade vergangene Prüfung ...</b>                                                   |   |   |   |   |   |
| A1 | ... erschien mir geeignet, die praktischen Fertigkeiten des Studierenden abzubilden.       | 1 | 2 | 3 | 4 | 5 |
| A2 | ... erschien mir praxisnah.                                                                | 1 | 2 | 3 | 4 | 5 |
|    | <b>Ich als Simulationspatient/in ...</b>                                                   |   |   |   |   |   |
| P1 | ... empfand die Schwierigkeit der von mir dargestellten Situation(en) als angemessen.      | 1 | 2 | 3 | 4 | 5 |
| P2 | ... konnte in meiner/meinen Rolle(n) authentisch mit dem/der Studierenden umgehen.         | 1 | 2 | 3 | 4 | 5 |
| P3 | ... fühlte mich gestresst.                                                                 | 1 | 2 | 3 | 4 | 5 |
| P4 | ... hatte Spaß an der Prüfung.                                                             | 1 | 2 | 3 | 4 | 5 |
| P5 | ... fühlte mich gut auf die Prüfung vorbereitet.                                           | 1 | 2 | 3 | 4 | 5 |
| P6 | ... hatte mit der Vorbereitung auf die Prüfung viel Aufwand.                               | 1 | 2 | 3 | 4 | 5 |
| P7 | ... werde für meine Leistung angemessen entlohnt.                                          | 1 | 2 | 3 | 4 | 5 |
|    | <b>Der/die soeben geprüfte Studierende...</b>                                              |   |   |   |   |   |
| S1 | ... wirkte nervös.                                                                         | 1 | 2 | 3 | 4 | 5 |
| S2 | ... wirkte im Umgang mit mir authentisch.                                                  | 1 | 2 | 3 | 4 | 5 |
| S3 | ... wirkte gestresst.                                                                      | 1 | 2 | 3 | 4 | 5 |
| S4 | ... wirkte mit der Prüfungssituation überfordert.                                          | 1 | 2 | 3 | 4 | 5 |
| S5 | ... schien Spaß an der Prüfung zu haben.                                                   | 1 | 2 | 3 | 4 | 5 |
| S6 | ... wirkte interessiert an den geprüften Lehrinhalten.                                     | 1 | 2 | 3 | 4 | 5 |
| S7 | ... konnte sich auf die dargestellte(n) Situation(en) als Therapeut/Therapeutin einlassen. | 1 | 2 | 3 | 4 | 5 |
| S8 | ... erscheint mir für die Arbeit als Psychologische/r Psychotherapeut/in geeignet.         | 1 | 2 | 3 | 4 | 5 |
|    | <b>Fragen zur Prüfungssituation:</b>                                                       |   |   |   |   |   |
| M1 | Die dargestellte(n) Situation(en) war(en) nah am psychotherapeutisch-klinischen Alltag.    | 1 | 2 | 3 | 4 | 5 |

N1 Ich hätte dem/der soeben geprüften Studierenden für Teil 2 folgende Note gegeben: \_\_\_\_\_

**Für weitere Anmerkungen jeglicher Art zur vergangenen Prüfung von Ihnen sind wir sehr dankbar:**

---

---

---

---

---

---

---

---

---

---

---

---

*Vielen Dank!*
